# Supplementary material
Source: Research Square preprint supplement (doi:10.21203/rs.3.rs-9033099/v1)
Supplement: Supplementary file 1 [file 8923bafac4352c1d9a83447d.doc]

Table 2. Distribution of patients’ sociodemographic data (N=41)

| Variables | Group | N or Median (min-max) | % or Mean±D |
| --- | --- | --- | --- |
| Age |  | 34 (19.00-66.00) | 36.70±12.07 |
| Sex | Female | 14 | 34.15 |
|  | Male | 27 | 65.85 |
| Height (cm) |  | 172.0 (155.0-191.0) | 173.50±8.80 |
| Weight (kg) |  | 71.50 (44.0-110.0) | 72.23±16.65 |
| BMI |  | 23.48 (16.0-40.0) | 23.99±5.27 |
| Diagnosis | Colitis ulcerosa | 22 | 53.65 |
|  | Chrohn's disease | 19 | 46.35 |
| Age at diagnosis |  | 30.0 (16-66) | 31.68±11.27 |
| School | Primary school | 5 | 12.2 |
|  | Elementary school | 7 | 17.1 |
|  | High school | 10 | 24.4 |
|  | University | 19 | 46.3 |
| Level of income | <5000 TRY | 3 | 7.3 |
|  | 5000-10000 TRY | 24 | 58.5 |
|  | >10000 TRY | 14 | 34.2 |
| Marital Status | Single | 16 | 39 |
|  | Married | 25 | 61 |
| Smoking | Non-smoker | 32 | 78 |
|  | Smoker | 9 | 22 |
| Study | Unemployed | 17 | 41.5 |
|  | Employed | 24 | 58.5 |
| Anti-TNF treatment | Not receiving | 26 | 63.4 |
|  | Receiving | 15 | 36.6 |
| Use of Antidepressants | None | 28 | 68.3 |
|  | Positive | 13 | 31.7 |
| Central catheter use | None | 35 | 85.4 |
|  | Positive | 6 | 14.6 |

|  |
| --- |
