# Supplementary material
Source: Research Square preprint supplement (doi:10.21203/rs.3.rs-9033099/v1)
Supplement: Supplementary file 2 [file ab3ffc9a40799029c789eb05.docx]

Table 3. Comparison of Scale and Sub-Scale Dimensions before and after the leucocyteapheresis (GCAP)

| Variables | Pre- GCAP Mean±SD | Post- GCAP Mean±SD | P value |
| --- | --- | --- | --- |
| Beck’s anxiety score | 12.58±9.62 | 8.13±7.14 | 0.018 |
| Beck’s depression score | 16.80±8.39 | 11.10±5.98 | **<0.001** |
| Illness anxiety score | 14.37±5.01 | 7.43±7.43 | **<0.001** |
| Physical functionality | 15.80±2.49 | 21.17±3.34 | **0.017** |
| Physical role difficulty | 26.50±32.40 | 30.87±37.26 | 0.427 |
| Pain | 54.03±27.98 | 58.33±28.81 | 0.253 |
| Overall perceived health | 41.12±19.06 | 48.25±18.10 | **0.001** |
| Vitality | 41.50±19.22 | 50.62±16.49 | **0.002** |
| Social functionality | 44.88±24.35 | 58.52±24.13 | **<0.001** |
| Emotional role difficulty | 40.41±30.93 | 41.50±36.46 | 0.815 |
| Mental health | 49.60±19.34 | 59.60±17.02 | **<0.001** |
| Health change | 53.37±30.28 | 63.62±33.04 | **0.017** |
