# Supplementary material
Source: Research Square preprint supplement (doi:10.21203/rs.3.rs-9033099/v1)
Supplement: Supplementary file 3 [file db58eb5447d4718e290f728b.doc]

**Table 1: Beck’s Anxiety Inventory Beck’s Depression Inventory**

8–15: Mild anxiety 1-10: Normal

16-25: Moderate anxiety 11-16: Mild Mood Disturbance

26-63: Severe anxiety 17-20: Borderline Clinical Depression

21-30: Moderate Depression

31-40: Severe Depression

40 and above: Extreme depression
