# Supplementary material
Source: Research Square preprint supplement (doi:10.21203/rs.3.rs-9033099/v1)
Supplement: Supplementary file 4 [file faf181131b6d8f2c6abe60ed.docx]

Table 4: Comparison of laboratory parameters before and after the leucocyteapheresis

| Leukocyte (/mm3) | 8036.55±3764.02 | 7884.98±2914.51 | 0.813 |
| --- | --- | --- | --- |
| Neutrophils (/mm3) | 6470±2352.93 | 6686.25±2189.13 | 0.619 |
| Hemoglobin (g/dl) | 12.28±2.08 | 11.48±1.91 | **0.002** |
| HCT (%) | 37.47±4.94 | 35.16±5.08 | **0.002** |
| PLT (/mm3) | 350350±142049.93 | 226115.08±80949.04 | **<0.001** |
| Monocyte (/mm3) | 714.58±375.34 | 520.2±258.69 | **0.006** |
| Lymphocyte (/mm3) | 2180.18±1534.56 | 1961.18±1052.25 | 0.475 |
| Prothrombin time (sec) | 14.23±1.27 | 14.52±1.51 | 0.310 |
| Time of activated partial thromboplastin (sec) | 31.27±3.71 | 70.2±143.15 | 0.145 |
| INR | 1.08±0.1 1.1±0.12 | 1.1±0.12 | 0.359 |
| Fibrinogen (mg/dL) | 476.88±229.59 | 387.71±204.7 | 0.070 |
| C-reactive protein (mg/L) | 20.59±33.46 | 9.3±15.95 | **0.024** |
| Ferritin (ng/mL) | 68.00±95.89 | 45.88±52.49 | 0.111 |
| Sedimentation (mm/h) | 18.59±14.44 | 14.03±12.88 | **0.031** |
